# Supplementary material for: Small Heat Shock Protein (sHsp22.98) from Trialeurodes vaporariorum Plays Important Role in Apple Scar Skin Viroid Transmission
Source: MDPI journal article supplement (doi:10.3390/v15102069), 2023-10-09
Supplement: s1 [file s1]

## Supplementary Material

### Plant mediated silencing of sHSP in *T. vaporariorum*:

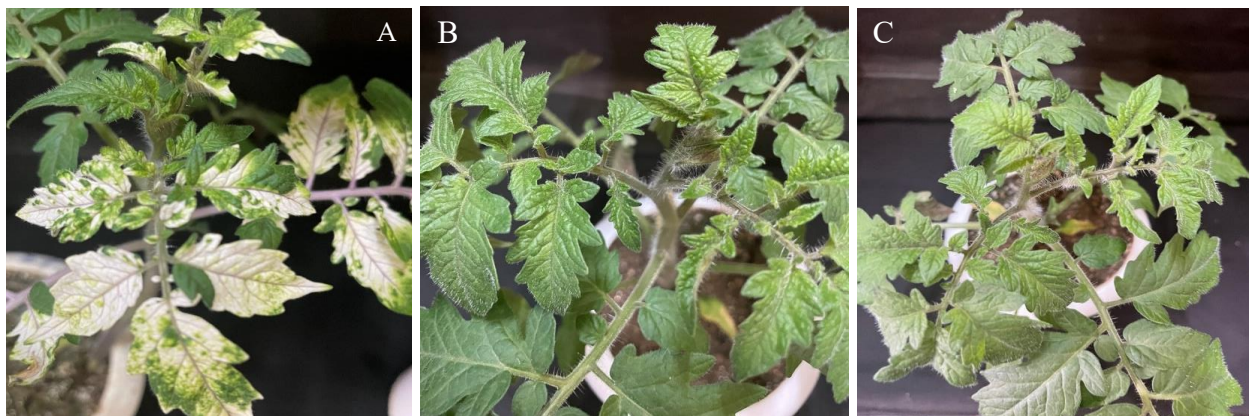

Supplementary Figure S1. Generation of dsRNA through VIGS-TRV system: (A) Silencing of Tomato *PDS* gene (*phytoene desaturase*) (B) Mock inoculated plants (TRV-1 and TRV-2) (C) TRV-Tv sHsp22.98 infiltrated plants. The pictures shown were taken 3 weeks post agroinfiltration.
